# Supplementary material
Source: Research Square preprint supplement (doi:10.21203/rs.3.rs-9313269/v1)
Supplement: Supplementary file 1 [file 7fa25ddb30e325dde234d852.docx]

Pelvic Imaging in Testosterone-Treated Transgender Men: a Systematic Review and MRI-Cohort.

*Online Resources*

- Appendix A: Search strategy

- Appendix B: Quality assessment

- Appendix C: Bias assessment

**Appendix A: Search strategy**

- PUBMED SEARCH STRING FOR PELVIC

("Transgender Persons"[MeSH Terms] OR "Gender Dysphoria"[MeSH Terms] OR "Sexual and Gender Minorities"[MeSH Terms] OR transgender*[tiab] OR transmasculine[tiab] OR "trans masculine"[tiab] OR "trans men"[tiab] OR "trans man"[tiab] OR "female-to-male"[tiab] OR "female to male"[tiab] OR FtM[tiab] OR nonbinary[tiab] OR "non-binary"[tiab] OR "gender diverse"[tiab] OR "gender-diverse"[tiab] OR "gender incongru*"[tiab] OR AFAB[tiab] OR "assigned female at birth"[tiab]) AND ("Pelvis"[MeSH Terms] OR pelv*[tiab] OR "Uterus"[MeSH Terms] OR uter*[tiab] OR "Ovary"[MeSH Terms] OR ovar*[tiab] OR "Endometrium"[MeSH Terms] OR endometr*[tiab] OR "Cervix Uteri"[MeSH Terms] OR cervi*[tiab] OR adnex*[tiab] OR myometr*[tiab]) AND ( "Diagnostic Imaging"[MeSH Terms] OR "Magnetic Resonance Imaging"[MeSH Terms] OR "Ultrasonography"[MeSH Terms] OR "Tomography, X-Ray Computed"[MeSH Terms] OR MRI[tiab] OR "magnetic resonance"[tiab] OR ultrasound[tiab] OR ultrasonograph*[tiab] OR sonograph*[tiab] OR CT[tiab] OR "computed tomography"[tiab] OR imaging[tiab])

- EMBASE

('transgender person'/exp OR 'gender dysphoria'/exp OR 'sexual and gender minority'/exp OR transgender*:ti,ab OR transmasculine:ti,ab OR "trans masculine":ti,ab OR "trans men":ti,ab OR "trans man":ti,ab OR "female-to-male":ti,ab OR "female to male":ti,ab OR FtM:ti,ab OR nonbinary:ti,ab OR "non-binary":ti,ab OR "gender diverse":ti,ab OR "gender-diverse":ti,ab OR "gender incongru*":ti,ab OR AFAB:ti,ab OR "assigned female at birth":ti,ab) AND ('pelvis'/exp OR pelv*:ti,ab OR 'uterus'/exp OR uter*:ti,ab OR 'ovary'/exp OR ovar*:ti,ab OR 'endometrium'/exp OR endometr*:ti,ab OR 'cervix uteri'/exp OR cervi*:ti,ab OR adnex*:ti,ab OR myometr*:ti,ab) AND ('diagnostic imaging'/exp OR 'magnetic resonance imaging'/exp OR 'ultrasonography'/exp OR 'computed tomography'/exp OR MRI:ti,ab OR "magnetic resonance":ti,ab OR ultrasound:ti,ab OR ultrasonograph*:ti,ab OR sonograph*:ti,ab OR CT:ti,ab OR "computed tomography":ti,ab OR imaging:ti,ab)

- WEB OF SCIENCE

(("Transgender Persons" OR "Gender Dysphoria" OR "Sexual and Gender Minorities" OR transgender* OR transmasculine OR "trans masculine" OR "trans men" OR "trans man" OR "female-to-male" OR "female to male" OR FtM OR nonbinary OR "non-binary" OR "gender diverse" OR "gender-diverse" OR "gender incongru*" OR AFAB OR "assigned female at birth") AND ("Pelvis" OR pelv* OR "Uterus" OR uter* OR "Ovary" OR ovar* OR "Endometrium" OR endometr* OR "Cervix Uteri" OR cervi* OR adnex* OR myometr*) AND ("Diagnostic Imaging" OR "Magnetic Resonance Imaging" OR "Ultrasonography" OR "Tomography, X-Ray Computed" OR MRI OR "magnetic resonance" OR ultrasound OR ultrasonograph* OR sonograph* OR CT OR "computed tomography" OR imaging))

- SCOPUS

((transgender* OR transmasculine OR "trans masculine" OR "trans men" OR "trans man" OR "female-to-male" OR "female to male" OR FtM OR nonbinary OR "non-binary" OR "gender diverse" OR "gender-diverse" OR "gender incongru*" OR AFAB OR "assigned female at birth") AND (pelv* OR pelvis OR uter* OR ovary OR ovar* OR endometr* OR cervi* OR adnex* OR myometr*) AND (MRI OR "magnetic resonance" OR ultrasound OR ultrasonograph* OR sonograph* OR CT OR "computed tomography" OR imaging))

**Appendix B: Quality assessment**

**QuADS-criteria**

1. Theoretical or conceptual underpinning to the research
2. Statement of research aim/s
3. Clear description of research setting and target population
4. The study design is appropriate to address the stated research aim/s
5. Appropriate sampling to address the research aim/s
6. Rationale for choice of data collection tool/s
7. The format and content of data collection tool is appropriate to address the stated research aim/s
8. Description of data collection procedure
9. Recruitment data provided
10. Justification for analytic method selected
11. The method of analysis was appropriate to answer the research aim/s
12. Evidence that the research stakeholders have been considered in research design or conduct.
13. Strengths and limitations critically discussed

| Author (YoP) | Q1 | Q2 | Q3 | Q4 | Q5 | Q6 | Q7 | Q8 | Q9 | Q10 | Q11 | Q12 | Q13 | TOTAL |
| --- | --- | --- | --- | --- | --- | --- | --- | --- | --- | --- | --- | --- | --- | --- |
| Caanen (2017) | 2 | 3 | 3 | 2 | 2 | 2 | 3 | 2 | 2 | 2 | 2 | 1 | 2 | 28/39 |
| Borrás (2021) | 2 | 3 | 3 | 2 | 2 | 2 | 3 | 2 | 2 | 2 | 2 | 1 | 2 | 28/39 |
| Yaish (2021) | 2 | 3 | 3 | 3 | 2 | 2 | 2 | 2 | 2 | 2 | 2 | 1 | 2 | 28/39 |
| Asseler (2022) | 2 | 3 | 3 | 2 | 2 | 3 | 3 | 2 | 2 | 2 | 2 | 1 | 3 | 30/39 |
| Pallotti (2023) | 2 | 3 | 2 | 3 | 2 | 2 | 2 | 2 | 2 | 2 | 2 | 1 | 2 | 27/39 |
| Rahman (2024) | 1 | 2 | 3 | 2 | 1 | 1 | 2 | 1 | 2 | 1 | 1 | 1 | 1 | 19/39 |
| Giacomozzi (2025) | 2 | 3 | 3 | 2 | 3 | 1 | 2 | 2 | 2 | 2 | 2 | 1 | 3 | 28/39 |
| Middleton (2025) | 1 | 2 | 2 | 2 | 2 | 1 | 1 | 1 | 1 | 1 | 2 | 1 | 1 | 18/39 |
| TOTAL |  |  |  |  |  |  |  |  |  |  |  |  |  | 25.8/39 |

*Q: question, YoP: year of publication*

**Appendix C: Bias assessment**

*Domains:*

D1: Risk of bias due to confounding
D2: Risk of bias arising from measurements of the exposure
D3: Risk of bias in selection of participants into the study (or into the analysis)
D4: Risk of bias due to post-exposure interventions
D5: Risk of bias due to missing data
D6: Risk of bias arising from the measurement of the outcome
D7: Risk of bias in selection of the reported result

| Author (YoP) | D1 | D2 | D3 | D4 | D5 | D6 | D7 | G.A. |
| --- | --- | --- | --- | --- | --- | --- | --- | --- |
| Caanen (2017) | - | ? | - | ? | ? | + | ? | ? |
| Borrás (2019) | ? | ? | + | ? | - | - | ? | - |
| Yaish (2021) | ? | - | + | + | - | ? | ? | - |
| Asseler (2022) | ? | ? | ? | ? | ? | + | ? | ? |
| Pallotti (2023) | ? | + | ? | + | + | - | + | ? |
| Rahman (2024) | ? | - | ? | + | - | - | ? | - |
| Giacomozzi (2025) | ? | - | ? | ? | - | - | ? | - |
| Middleton (2025) | ? | ? | - | + | + | - | - | - |

*D: domains, YoP: year of publication, G.A.: global assessment. ?: moderate risk of bias, +: no or mild risk of bias, -: high risk of bias.*
